# Supplementary material for: Carboxylic Acid-Functionalized Conducting-Polymer Nanotubes as Highly Sensitive Nerve-Agent Chemiresistors
Source: PubMed Central journal article supplement (PMC5030647; doi:10.1038/srep33724), 2016-09-21
Supplement: srep33724-s1.pdf [file srep33724-s1.pdf]

*Supplementary Information*

Carboxylic Acid-Functionalized Conducting-Polymer Nanotubes  
as Highly Sensitive Nerve-Agent Chemiresistors

Oh Seok Kwon,<sup>1,§</sup> Chul Soon Park,<sup>1,§</sup> Seon Joo Park,<sup>1,2</sup> Seonmyeong Noh,<sup>3</sup> Saerona Kim,<sup>3</sup>  
Hye Jeong Kong,<sup>3</sup> Joonwon Bae,<sup>4</sup> Chang-Soo Lee,<sup>1,5,\*</sup> Hyeonseok Yoon,<sup>3,6,\*</sup>

<sup>1</sup>Hazards Monitoring Bionano Research Center, Korea Research Institute of Bioscience and Biotechnology (KRIBB), Daejeon 34141, South Korea

<sup>2</sup>Center for Integrated Smart Sensors, Daejeon 34141, South Korea

<sup>3</sup>Department of Polymer Engineering, Graduate School, Chonnam National University, Gwangju 61186, South Korea

<sup>4</sup>Department of Applied Chemistry, Dongduk Women's University, Seoul 02748, South Korea

<sup>5</sup>Nanobiotechnology and Bioinformatics (Major), University of Science & Technology (UST), Daejeon 34141, South Korea

<sup>6</sup>School of Polymer Science and Engineering, Chonnam National University, Gwangju 61186, South Korea

<sup>§</sup>These authors contributed equally to this work

Corresponding Authors:

\*E-mail: cslee@kribb.re.kr, hyoon@chonnam.ac.kr

## Synthesis of DMTMM

DMTMM provides excellent reaction yields in water as well as alcohol phases for the condensation reaction between carboxylic acid and amine groups. First, 0.75 g of 2-chloro-4,6-dimethoxy-1,3,5-triazine was reacted with 1 g of *N*-methyldmorpholine in 20 mL of tetrahydrofuran (THF) for 30 min. The resulting white precipitates were thoroughly washed with excess THF and then dried. The final product was stored in a freezer under 20 °C.
